# Supplementary material for: An electrostatic self-assembly route to prepare C-dots/gold nanoclusters for dual-emission ratiometric optical thermometry in living cells
Source: Royal Society of Chemistry journal article supplement (doi:10.1039/c9ay01115c), 2019-01-01
Supplement: c9ay01115c1.pdf [file c9ay01115c1.pdf]

## Electrostatic self-assembly route to prepare C-dots/gold nanoclusters

### dual-emission ratiometric optical thermometry in living cells

Yunxiao Jia<sup>1,3</sup>, Xiaojie Zhang<sup>3</sup>, Chunxia Yin<sup>3</sup>, Xun Zhang<sup>1</sup>, Jiaping Zhang<sup>2</sup>, Xinwai Wang<sup>2</sup>, Jingwei Xin<sup>2\*</sup>

<sup>1</sup>College of Chemistry, Jilin University, Changchun, 130012, P.R. China

<sup>2</sup>Department of Thyroid Surgery, Jilin Provincial Key Laboratory of Surgical Translational Medicine, China-Japan Union Hospital of Jilin University, Changchun, 130033, P.R. China

<sup>3</sup>Department of Gynecology and Obstetrics, Changchun Obstetrics-Gynecology Hospital, Changchun, Jilin, 130042, P.R. China

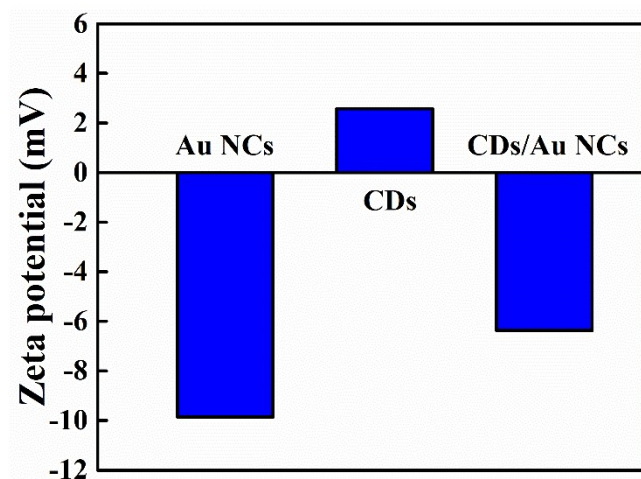

**Fig S1.** The Zeta potential of Au NCs, CDs and CDs/AuNCs.

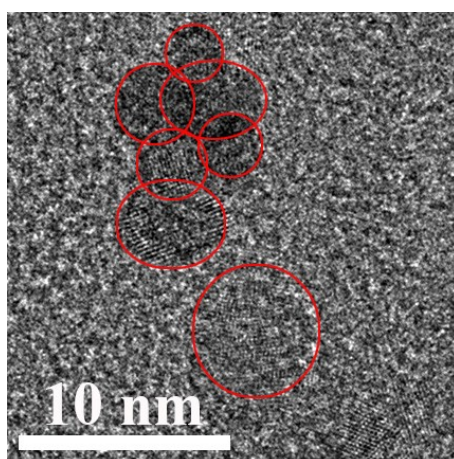

**Fig S2.** The high resolution TEM image of CDs/AuNCs hybrid nanomaterials.

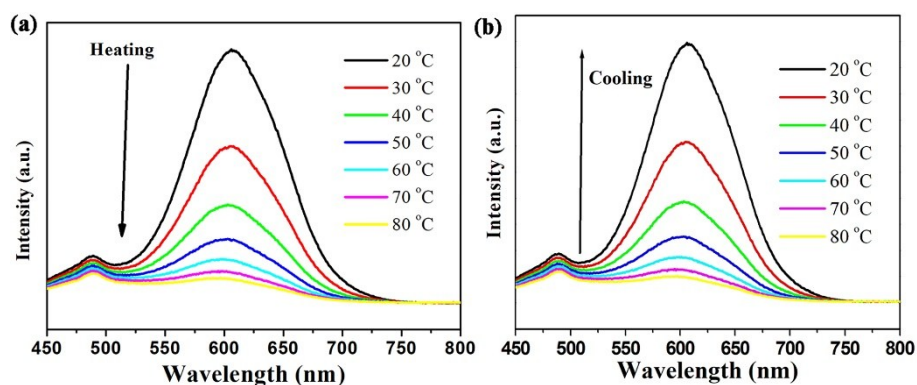

**Fig S3.** Temperature dependence of the emission intensity from GSH-AuNCs in aqueous solution. (a) Fluorescence emission spectra measured under the excitation of 430 nm with the increase of the temperature from 20 to 80 °C; (b) fluorescence emission spectra measured under the excitation of 430 nm with the decrease of the temperature from 80 to 20 °C (from bottom to top).

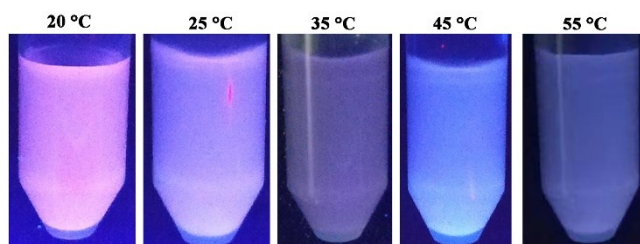

**Fig S4.** The fluorescent images of CDs/AuNCs hybrid nanomaterials in aqueous solution with 20 °C, 25 °C, 35 °C, 45 °C and 55 °C.
